# Supplementary material for: Anatomical Consideration of the Anterolateral Ligament of the Knee
Source: Biomed Res Int. 2019 Apr 11;2019:5740473. doi: 10.1155/2019/5740473 (PMC6487136; doi:10.1155/2019/5740473)
Supplement: Supplementary Materials — The data of the prevalence and anatomical measurements of the anterolateral ligament in Korean attached as Supplementary Materials. [file 5740473.f1.xlsx]

## Sheet: Measurement
	ID	F:1, M:2	age	H	W	R:1, L:2	ALL	blended_ant.capsule	to tip of fibular head	length_ext	width_joint	thickness_joint
1	16-257F87	1	87	153	26	1	o	o
	16-257F87	1	87	153	26	2	o	o	9.05	30.74	6.43	0.41
2	16-241M86	2	86	169	56	1	o		22.21	29.93	5.01	0.8
	16-241M86	2	86	169	56	2	x
3	16-251M88	2	88	163	51	1	x
	16-251M88	2	88	163	51	2	x
4	16-194M75	2	75	172	26	1	o	o
	16-194M75	2	75	172	26	2	o	o
5	16-202F88	1	88	152	42	1	o	o	20.3	32.56	5.67	1.63
	16-202F88	1	88	152	42	2	o		15.36	31.97	7.94	0.35
6	16-056F93	1	93	160	48	1	x
	16-056F93	1	93	160	48	2	x
7	16-176F94	1	94	154	44	1	o		21.66	28.98	4.71	0.46
	16-176F94	1	94	154	44	2	x
8	16-166M73	2	73	161	54	1	o	o
	16-166M73	2	73	161	54	2	x
9	16-074F81	1	81	152	46	1	o	o
	16-074F81	1	81	152	46	2	x
10	16-196M78	2	78	162	82	1	o
	16-196M78	2	78	162	82	2	o	o
11	16-177F100	1	100	139	24	1	o	o	15.44	26.77	6.71	2.12
	16-177F100	1	100	139	24	2	x
12	16-247M78	2	78	157	62	1	o	o	14.77	28.39	5.3	1.58
	16-247M78	2	78	157	62	2	x
13	16-214F57	1	57	156	54	1	o	o	17.07	27.62	2.49	0.88
	16-214F57	1	57	156	54	2	x
14	16-203F85	1	85	153	54	1	o
	16-203F85	1	85	153	54	2	x
15	16-161M76	2	76	169	70	1	x
	16-161M76	2	76	169	70	2	x
16	16-265F92	1	92	142	48	1	x
	16-265F92	1	92	142	48	2	x
17	16-246F80	1	80	148	46	1	o	o
	16-246F80	1	80	148	46	2	o	o
18	16-236M64	2	64	174	72	1	x
	16-236M64	2	64	174	72	2	x
19	16-280F75	1	75	159	66	1	x
	16-280F75	1	75	159	66	2	x
20	16-238M87	2	87	165	76	1	x
	16-238M87	2	87	165	76	2	x
21	16-284M64	2	64	173	60	1	x
	16-284M64	2	64	173	60	2	x
22	16-279F74	1	74	154	46	1	x
	16-279F74	1	74	154	46	2	x
23	16-298M74	2	74	165	54	1	x
	16-298M74	2	74	165	54	2	o	o
24	16-288F102	1	102	153	62	1	o	o
	16-288F102	1	102	153	62	2	o	o	11.2	32.07	4.2	1
25	16-267F65	1	65	160	58	1	x
	16-267F65	1	65	160	58	2	x
26	16-295M78	2	78	162	50	1	o	o
	16-287M79	2	79	159	60	2	x
27	16-296M91	2	91	143	34	1	o	o
28	16-135F93	1	93	160	36	1	o	o	14.39	32.97	4.16	0.74
	16-135F93	1	93	160	36	2	o	o	12.04	28.69	4.34	1.34
29	16-294M83	2	83	161	52	1	x
30	17-034M73	2	73	155	38	2	o
31	17-040M67	2	67	162	48	1	x
32	17-051M79	2	79	172	56	1	o	o
33	17-056M71	2	71	172	70	1	o	o
	17-056M71	2	71	172	70	2	o	o
34	17-300F81	1	81	147	64	1	x
	17-300F81	1	81	147	64	2	x
35	17-318F65	1	65	150	60	2	x
36	18-070M62	2	62	183	84	1	x
	18-070M62	2	62	183	84	2	x
37	18-057M78	2	78	163	78	1	o	o			6.79	1.17
	18-057M78	2	78	163	78	2	o	o			8.27	2.66
38	18-037F86	1	86	137	38	1	o	o			5.71	1.13
	18-037F86	1	86	137	38	2	x
39	17-126M68	2	68	130	44	1	x
	17-126M68	2	68	130	44	2	o	o			2.54	1.2
40	18-109F87	1	87	150	26	1	o	o			4.61	2.42
	18-109F87	1	87	150	26	2	o	o			9.52	1.03
41	18-077F70	1	70	152	40	1	x
	18-077F70	1	70	152	40	2	x
42	18-118F94	1	94	152	44	1	o	o			7.42	2.56
	18-118F94	1	94	152	44	2	o	o			7.14	1.88
43	18-073M69	2	69	162	42	1	x
	18-073M69	2	69	162	42	2	o	o			6.53	1.46
44	18-053M72	2	72	157	46	1	o	o		28.25	4.51	2.91
	18-053M72	2	72	157	46	2	x
45	18-121M64	2	64	174	38	1	x
	18-121M64	2	64	174	38	2	x
46	18-084M62	2	62	166	28	1	o	o		21.12	4.8	1.25
	18-084M62	2	62	166	28	2	x
47	18-041M70	2	70	166	54	1	x
	18-041M70	2	70	166	54	2	x
48	18-097F78	1	78	147	40	1	o	o			8.08	1.09
	18-097F78	1	78	147	40	2	o	o		25.43	5.27	1.03
49	18-002M74	2	74	160	70	1	o	o			3.6	1.55
	18-002M74	2	74	160	70	2	x
50	18-024F77	1	77	156	48	1	o	o			6.97	1.32
	18-024F77	1	77	156	48	2	o	o			3.52	1.93
51	18-127F89	1	89	152	32	1	x
	18-127F89	1	89	152	32	2	x
52	18-125F95	1	95	162	36	1	o	o		45.31	0.38	0.33
	18-125F95	1	95	162	36	2	o	o		45.36	3.36	0.51
53	18-136F95	1	95	153	60	1	x
	18-136F95	1	95	153	60	2	x
54	18-128F71	1	71	155	52	1	o	o		40.93	1.97	0.35
	18-128F71	1	71	155	52	2	x
55	18-137F94	1	94	153	30	1	x
	18-137F94	1	94	153	30	2	x
56	19-105M78	2	78	172	56	1	x
	19-105M78	2	78	172	56	2	x
57	18-112F91	1	91	153	42	1	x
	18-112F91	1	91	153	42	2	x
58	18-108M79	2	79	172	50	1	o	o		36.73	4.49	0.74
	18-108M79	2	79	172	50	2	o	o		42.29	4.54	1.39
59	18-021M76	2	76	175	72	1	x
	18-021M76	2	76	175	72	2	x
60	18-018F76	1	76	151	50	1	x
	18-018F76	1	76	151	50	2	x
61	18-005M79	2	79	148	44	1	x
	18-005M79	2	79	148	44	2	x
62	18-009M81	2	81	161	46	1	x
63	18-036F80	1	80	153	46	1	x
64	18-060M65	2	65	170	62	1	x
	18-060M65	2	65	170	62	2	o	o

## Sheet: Index
ID	F:1, M:2	age	H	W	R:1, L:2	ALL	blended_ant.capsule	to tip of fibular head	length_ext	width_joint	thickness_joint
	Female		[cm]	[cm]	Side				[mm]	[mm]	[mm]
	Male				Right
					Left
